# Supplementary material
Source: PubMed Central journal article supplement (PMC3118569)
Supplement: NIHMS291711-supplement-1.pdf [file NIHMS291711-supplement-1.pdf]

### **Supplemental figure legends**

#### **Figure S1. Variable expression of the three AKT isoforms in human glioblastomas.**

Heatmap showing gene expression of AKT1, 2 and 3 in 189 human glioblastomas. Tumors with genomic amplification of EGFR are indicated by black bars under the heatmap. Gene expression data from 189 TCGA glioblastoma samples that also had available genomic SNP6 array data available was downloaded from the TCGA data portal (<http://tcga-data.nci.nih.gov/tcga/tcgaHome2.jsp>). The heatmap was generated using GeneMaths, with array normalization using all of the genes on the array. The samples with *EGFR* amplification were previously identified (Table S8 from ref (2)).

#### **Figure S2. *Pten* deletion and EGFRvIII expression accelerated PMA proliferation.**

Growth during serial passage of early passage PMAs from *Pten*<sup>CKO</sup> mice (A) or *Pten*<sup>CKO</sup>;*p53*<sup>CKO</sup> mice (B) alone or with expression of EGFRvIII (C and D). Expression of EGFRvIII further accelerates proliferation of PMAs established from all genotypes analyzed, whereas (E) knock-down of Akt3 did not alter PMA proliferation. Shown are mean cumulative population doublings ± SEM with the number (n) of individual cultures for each group shown in brackets.

#### **Figure S3. Deletion of *Akt1* did not rescue neuronal hypertrophy induced by *Pten* deletion.**

Mice deficient for *Akt1* were bred with *Pten*<sup>CKO</sup> mice where cre recombinase directed *Pten* deletion in granule neurons of the dentate gyrus. (A) Paraffin sections of dentate gyrus granule neurons were stained using IHC for *Pten* (brown) and nuclei were counterstained using hematoxylin (blue) from wild-type (WT), *Akt1*<sup>KO</sup>, *Pten*<sup>CKO</sup> or *Pten*<sup>CKO</sup>;*Akt1*<sup>KO</sup> mice. Note that the increased size of *Pten* negative neurons (lower panels) is not altered upon deletion of *Akt1* (lower right). (B) The nuclear size of *Pten* wildtype or conditional knockout (cKO) granule neurons of the dentate gyrus, from *Akt1* WT or KO brains, was measured using Bioquant image analysis software. Shown is the mean ± SD of 65 cells from seven mice per group for *Pten*<sup>CKO</sup> and four mice per group for wild-type mice.

#### **Figure S4. Deletion of *Pten* and *p53* with EGFRvIII expression was required for anchorage independent growth of astrocytes.**

Early passage PMAs were cultured from *Pten*<sup>WT</sup> or *Pten*<sup>CKO</sup> with or without *p53* deletion and transduced with control (GFP) or EGFRvIII expressing retrovirus. Cells were plated in soft agar and incubated for 10 days

before colonies were photographed. Shown are overlays of phase contrast and GFP fluorescence images. Scale bar indicates 50 $\mu$ m.

**Figure S5. Akt1 and Akt2 were not required for anchorage independent growth of transformed PMAs.** Early passage PMAs from *Pten*<sup>CKO</sup>;*p53*<sup>CKO</sup> mice were cultured and transduced with retrovirus to express EGFRvIII before plating in soft agar. (A) Overlays of representative phase contrast and GFP fluorescence of colonies from *Pten*<sup>CKO</sup>;*p53*<sup>CKO</sup>;EGFRvIII PMAs that were *Akt1*<sup>WT</sup>, *Akt1*<sup>KO</sup> alone or *Akt1*<sup>KO</sup> transduced with control (pLKO) or Akt2-specific shRNA-expressing lentivirus. Scale bar represents 50  $\mu$ m. (B) Quantification of (A). Colonies greater than 50 $\mu$ m were counted after 13-14 days. Graphed is the mean  $\pm$  SEM from three independently isolated cultures for each group.

**Figure S6. Deletion of Akt1 did not alter proliferation of Pten wild-type tumors.** (A) Immunohistochemistry for Ki67 (brown) on tumors resulting from intracranial implantation of *p53*<sup>CKO</sup>;*EGFRvIII* PMAs that were wild-type (WT) or knockout (KO) for *Akt1*. Slides were counterstained with hematoxylin (blue). (B) The percentage of Ki67 positive cells was determined by analysis of four representative fields of view from three individual tumors for each group. Shown is the mean  $\pm$  SEM.

**Figure S7. Akt2 or Akt3 knock-down decreased phospho-Akt levels *in vivo*.** Intracranial tumors derived from PMAs were lysed and analyzed by western blot for the indicated proteins. Shown are representative tumors from *p53*<sup>CKO</sup>;*EGFRvIII* or *Pten*<sup>CKO</sup>;*p53*<sup>CKO</sup>;*EGFRvIII* astrocytes that were (A) wild-type or knockout for *Akt1*, infected with control (pLKO) or lentivirus expressing either (B) Akt2-specific or (C) Akt3-specific shRNA. Note that phosphorylated Akt (S473 and T308) is not significantly different between Akt1 wild-type or knockout tumors, although it is elevated in Pten-deficient tumors as expected, however phospho-Akt S473 levels are decreased in Akt2 and Akt3 knockdown tumors regardless of Pten expression. The presence of Pten protein in the *Pten*-deficient tumors illustrates contamination of normal brain in the tissue samples and reflects the invasive nature of these tumors. Similarly the Akt1 signal in the *Akt1* knockout tumors is due to contamination of normal brain from the recipient nude mice. Immunoblots in (B) are from the same gel and autoradiography film exposure but several lanes were removed for clarity.

Figure S1

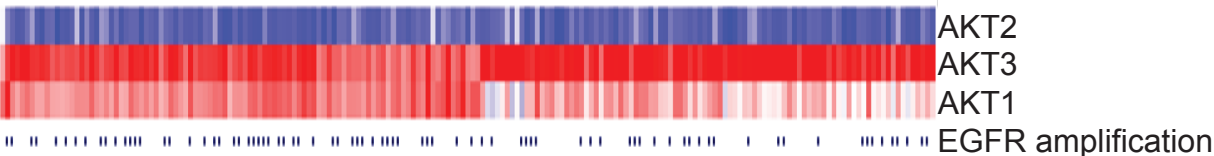

Figure S2

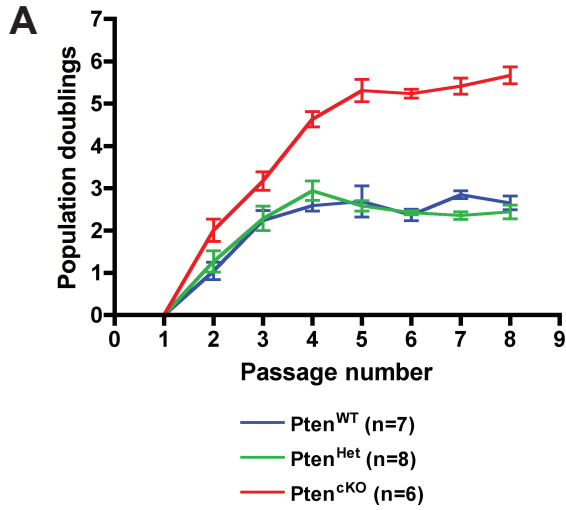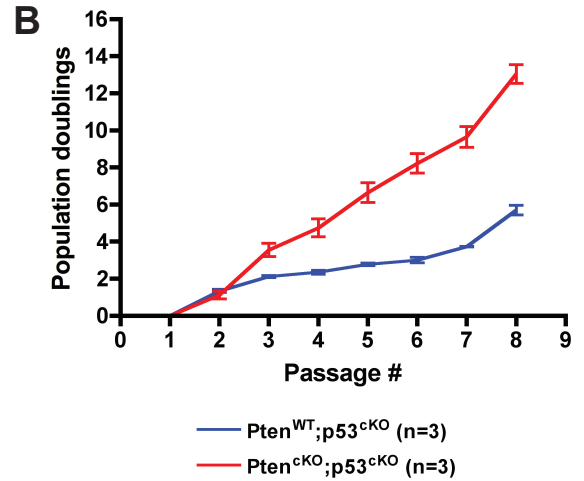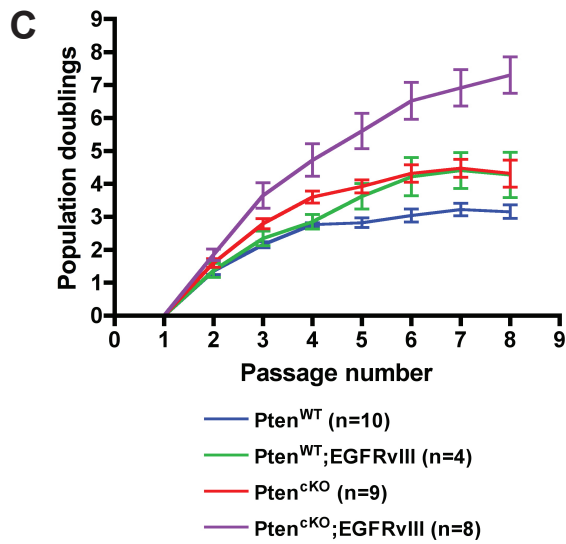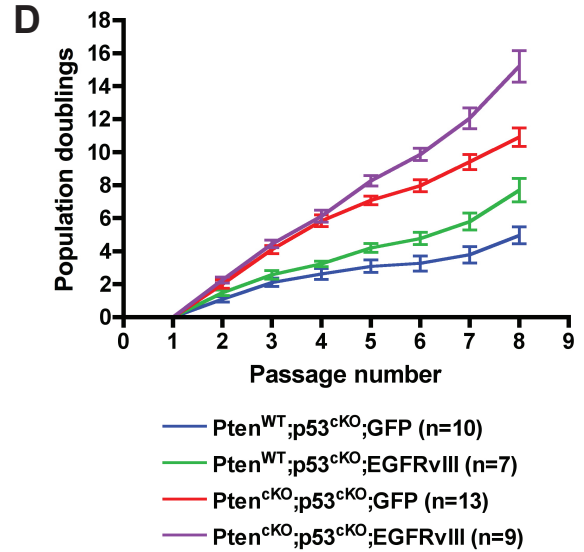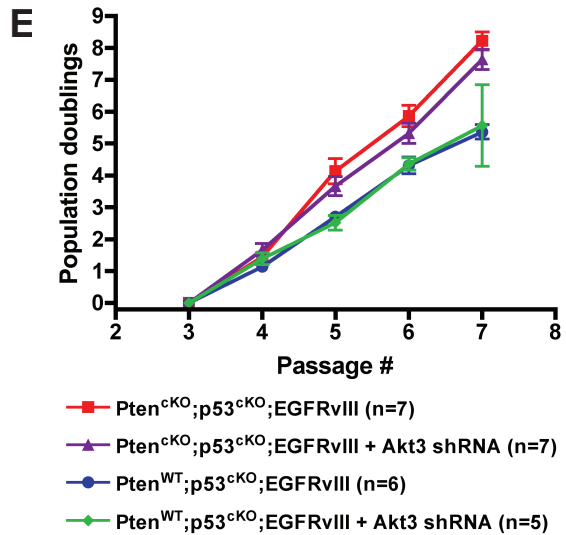



Figure S3

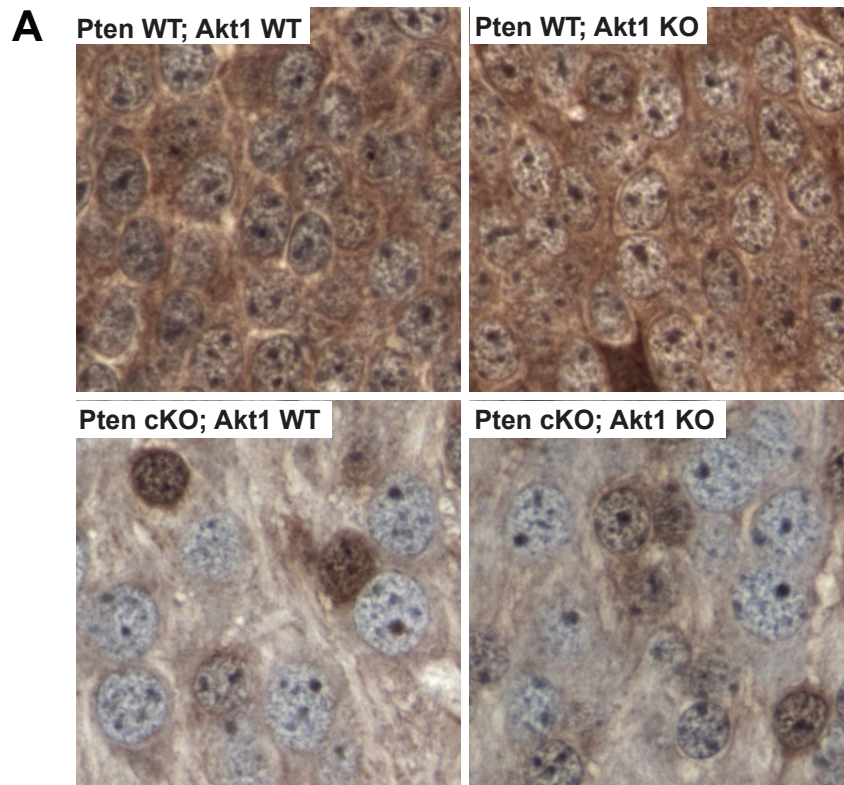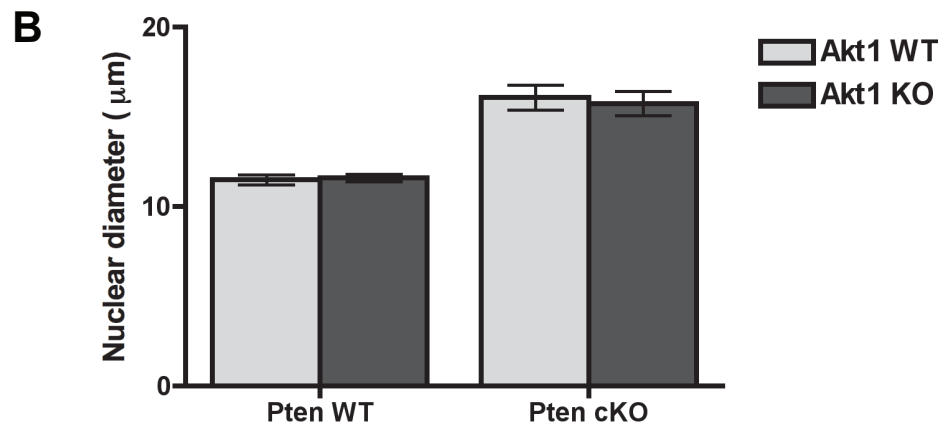

Figure S4

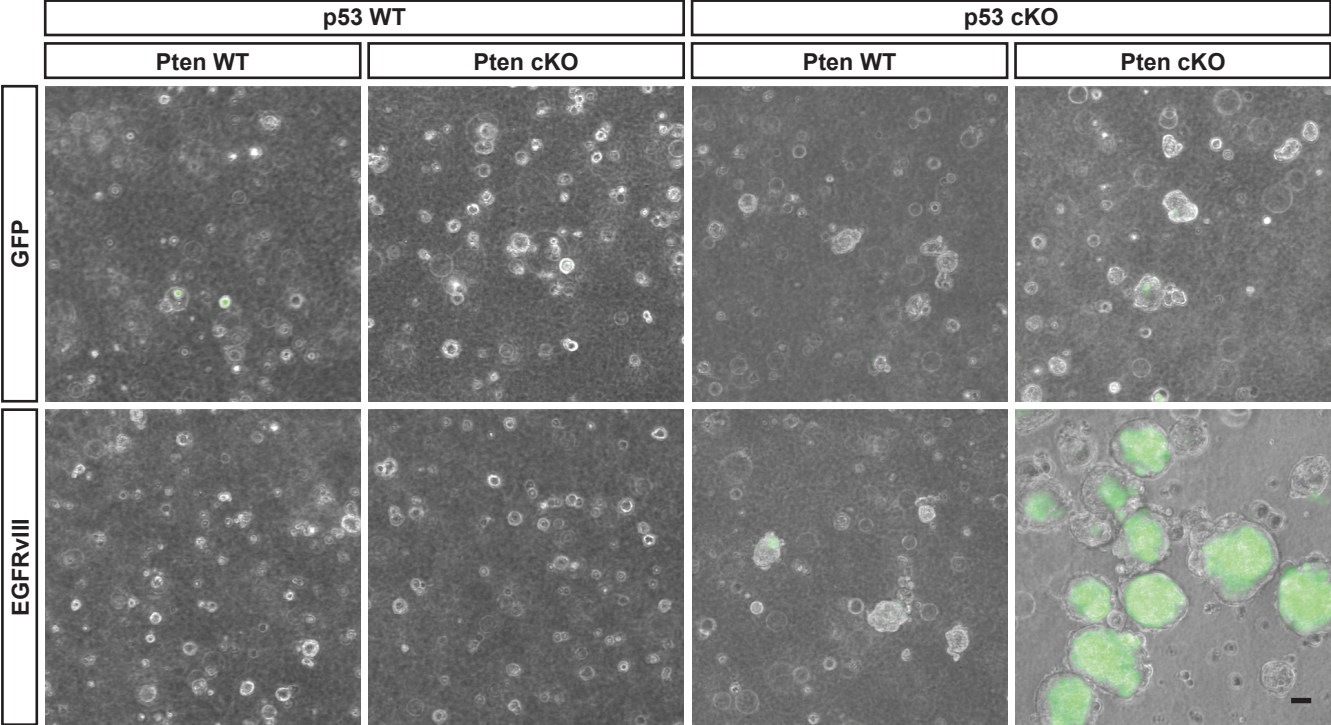

Figure S5

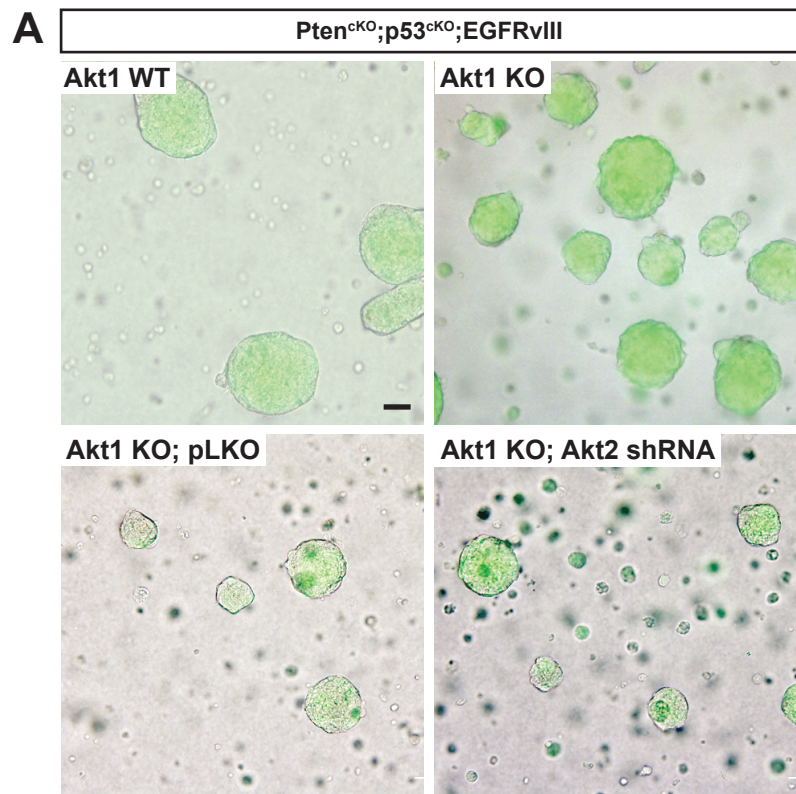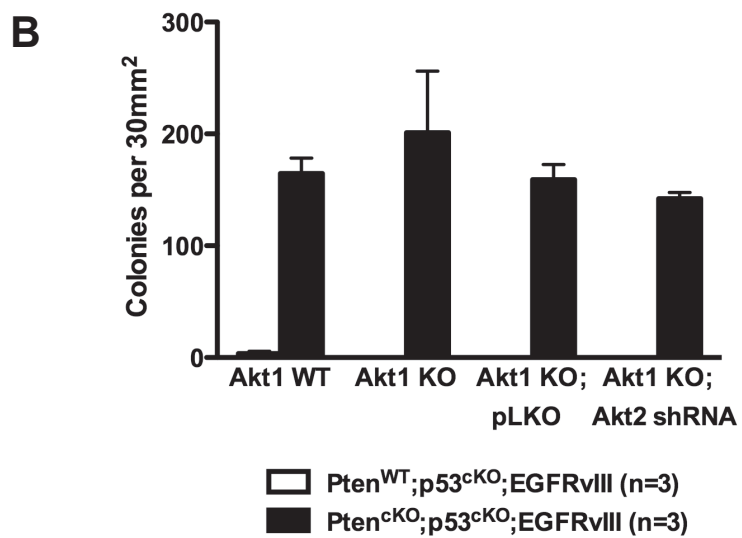

Figure S6

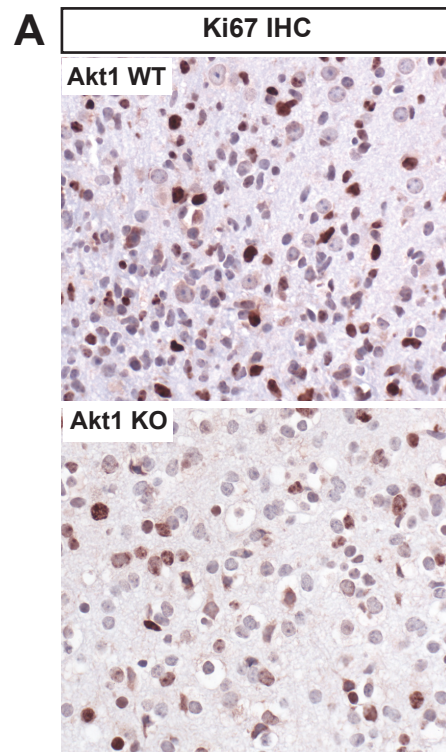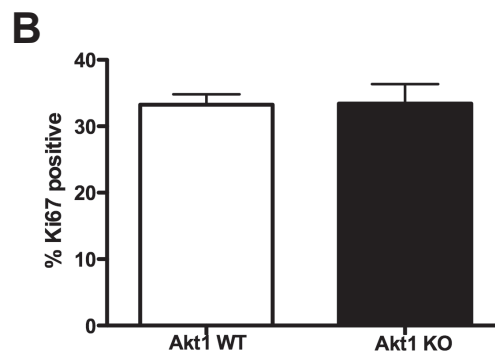



Figure S7

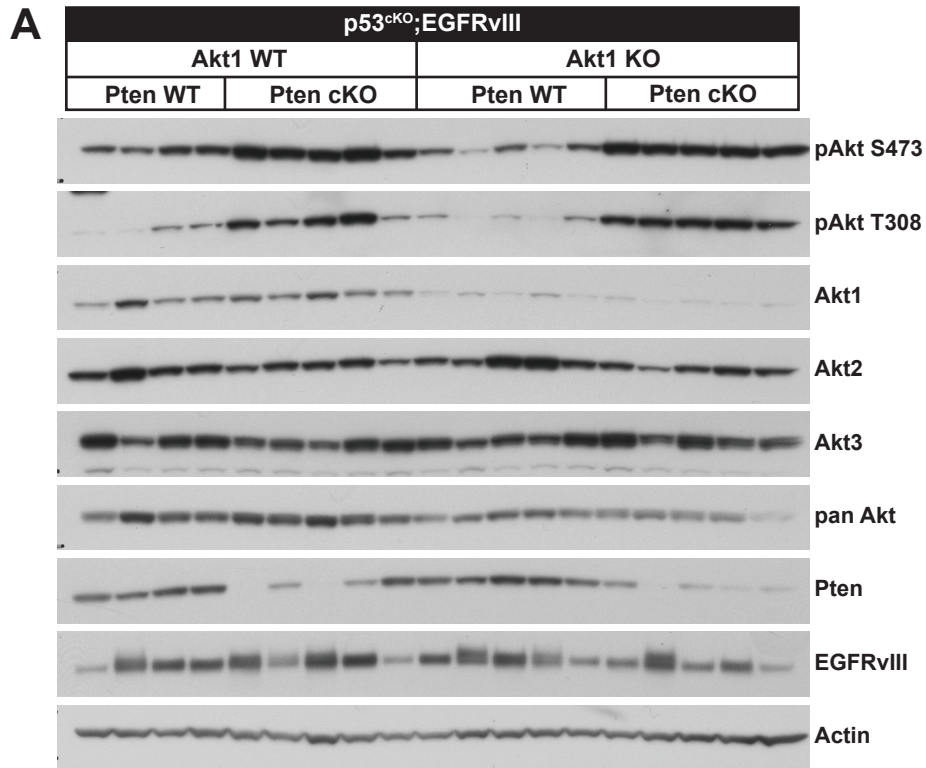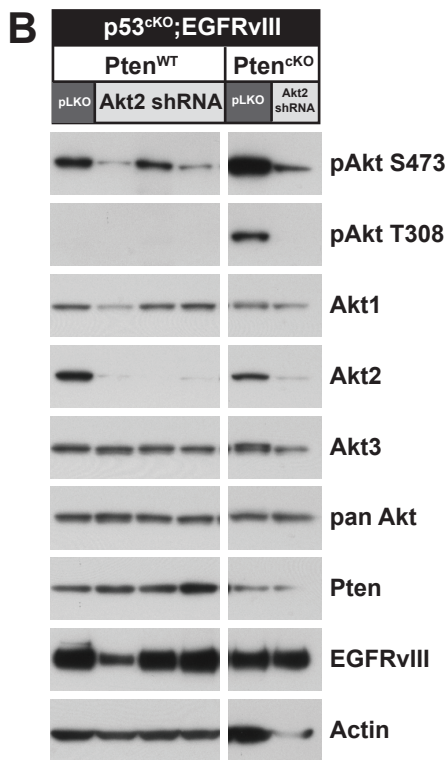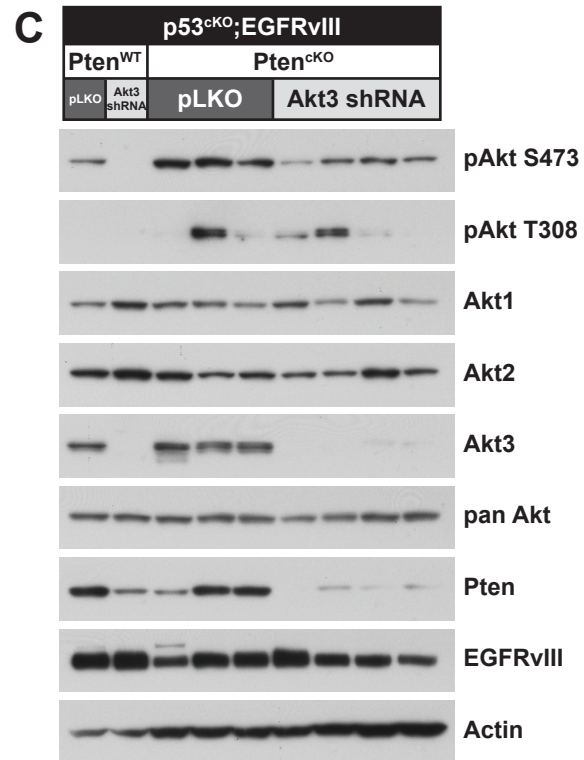

**Table S1. Summary of the tumors resulting from intracranial implantation of PMAs.** Indicated are the *Pten* and *p53* genotypes for each culture and if the cells were infected with EGFRvIII-expressing retrovirus. Indicated are the numbers of tumors obtained from the number of mice implanted. Median survival of recipient mice is listed as days following implantation of  $10^5$  cells per mouse.

| <b>Genotype</b>                                          | <b>Tumors / number of mice</b> | <b>Median latency (days)</b> |
|----------------------------------------------------------|--------------------------------|------------------------------|
| <i>Pten</i> <sup>WT</sup> ;EGFRvIII                      | 0/3                            | -                            |
| <i>Pten</i> <sup>WT</sup> ;p53 <sup>CKO</sup>            | 0/5                            | -                            |
| <i>Pten</i> <sup>WT</sup> ;p53 <sup>CKO</sup> ;EGFRvIII  | 34/34                          | 47.5                         |
| <i>Pten</i> <sup>CKO</sup> ;EGFRvIII                     | 0/6                            | -                            |
| <i>Pten</i> <sup>CKO</sup> ;p53 <sup>CKO</sup>           | 3/6                            | 216                          |
| <i>Pten</i> <sup>CKO</sup> ;p53 <sup>CKO</sup> ;EGFRvIII | 33/33                          | 26                           |

## ***Supplemental methods***

### *Primers*

For amplification of EGFRvIII:

Forward: ATGTCGACACCATGCGACCCTCCGGGACG

Reverse: TATGCGGCCGCGTCATGCTCCAATAAATTCAGTCTT

For amplification of Akt1:

Forward: TATAGTCGACCATGAACGACGTAGCCATTGTG

Reverse: TTTTGTGCGACTCAGGCTGTGCCACTGGC

For amplification of Akt3:

Forward: AGAATTCACCATGAGCGATGTTACCATTGTG

Reverse: TCAGATCTCATTCCCGTCCGCTTGCC

For mutation of Akt3 (K177A):

Forward:

GCAAGTGGAAAATACTATGCTATGGCCATTCTGAAGAAAGAAGTCATTATTG

Reverse:

CAATAATGACTTCTTTCTTCAGAATGGCCATAGCATAGTATTTTCCACTTGC

For mutation of Akt3-specific shRNA binding sequence (Akt3 and K177A):

Forward: CGCCCAGACCATCACCATCACACCACCTGAAAAGTATG

Reverse: GATGGTGATGGTCTGGGCGGTAAATTCTTCATCAAATATC
